# Supplementary material for: Breakage fusion bridge cycles drive high oncogene copy number, but not intratumoral genetic heterogeneity or rapid cancer genome change
Source: PubMed Central journal article supplement — bioRxiv. 2023 Dec 13:2023.12.12.571349. Preprint. [Version 1] doi: 10.1101/2023.12.12.571349 (PMC10760206; doi:10.1101/2023.12.12.571349), 2023-12-13

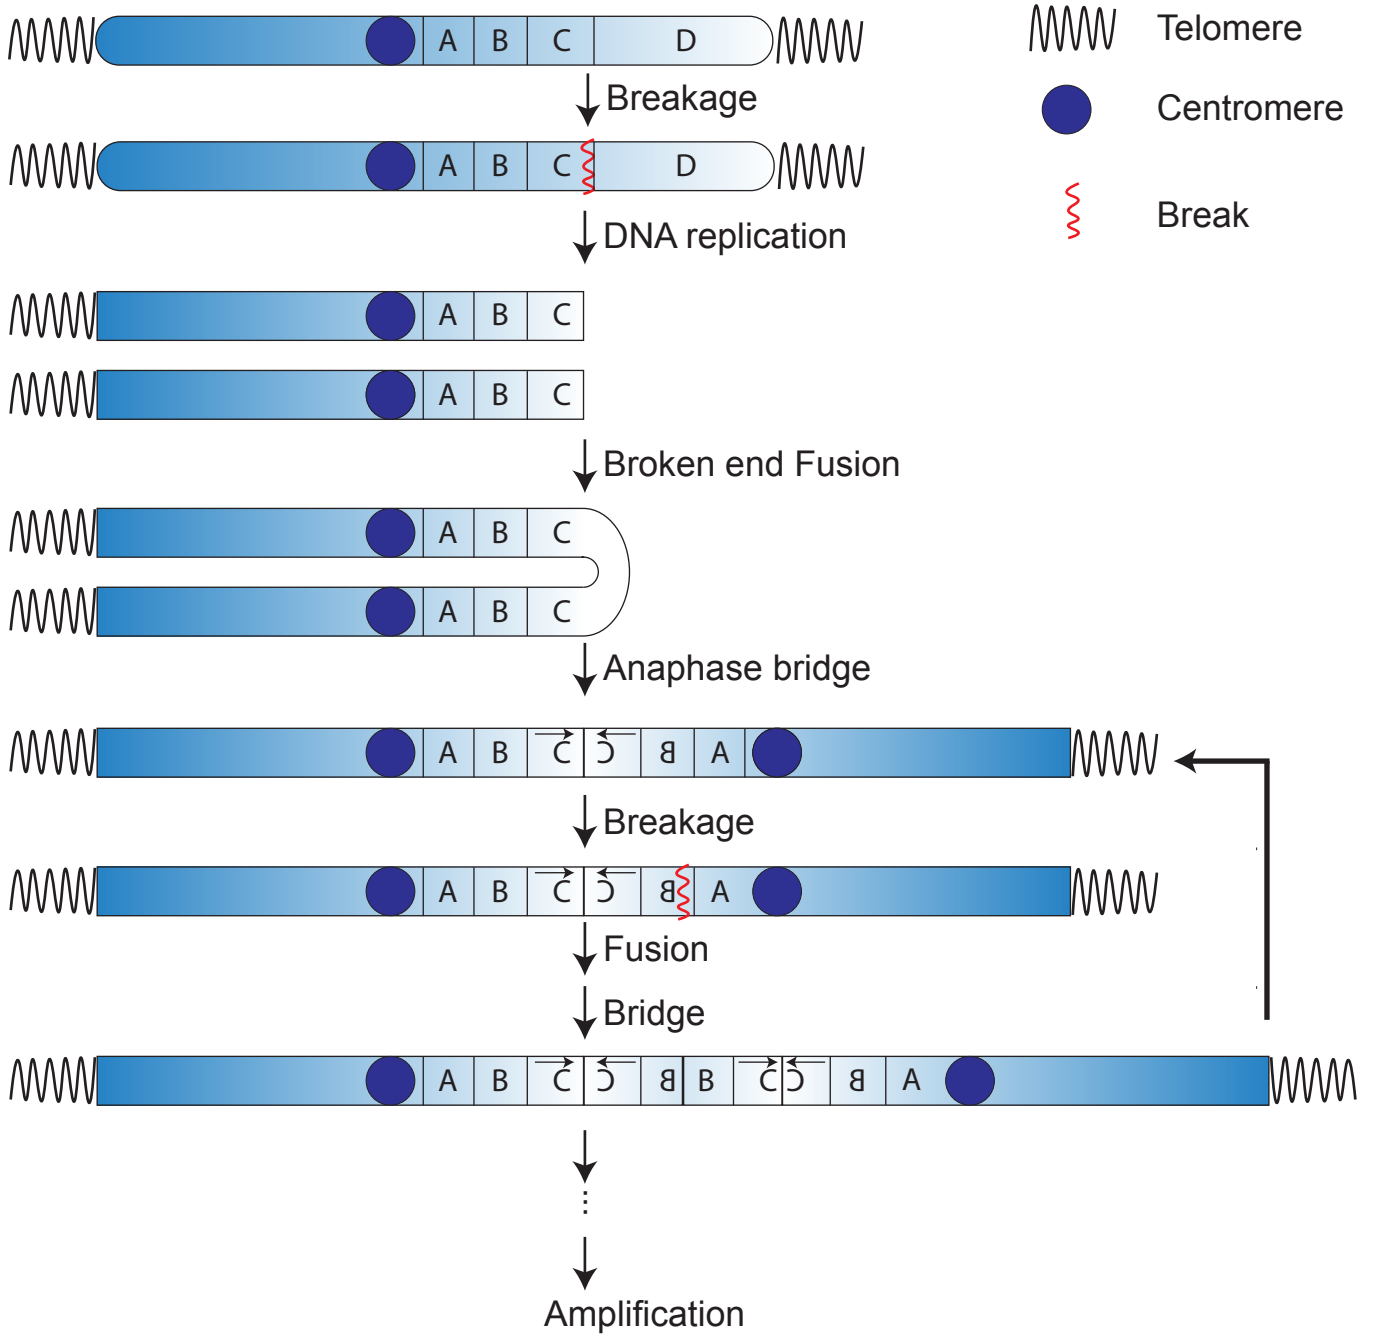

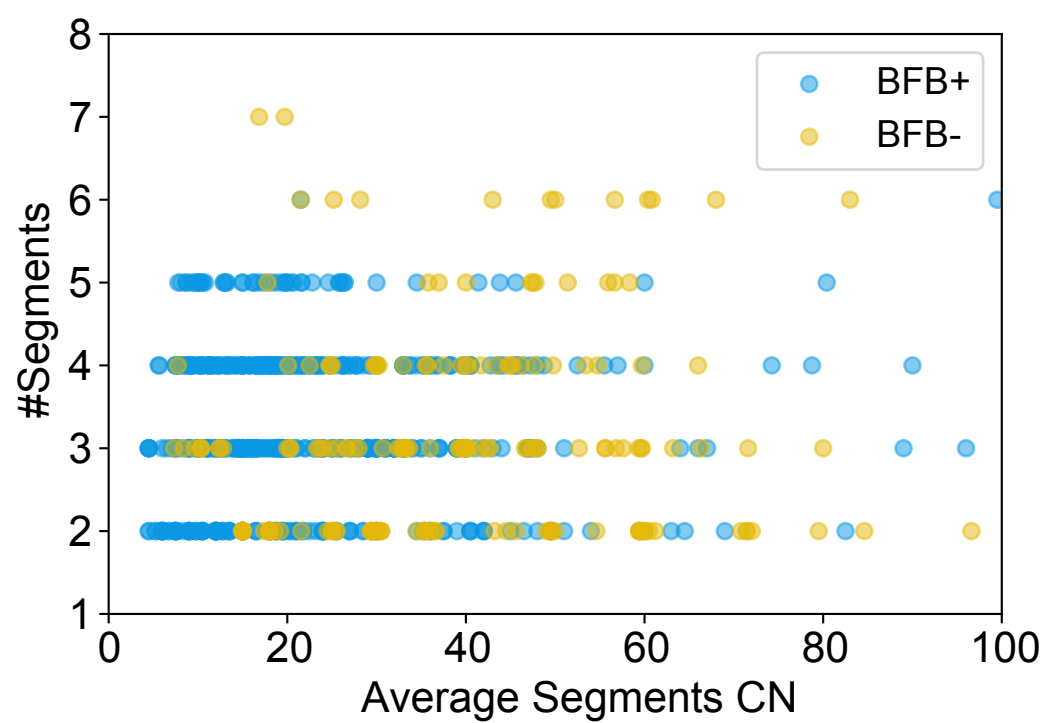

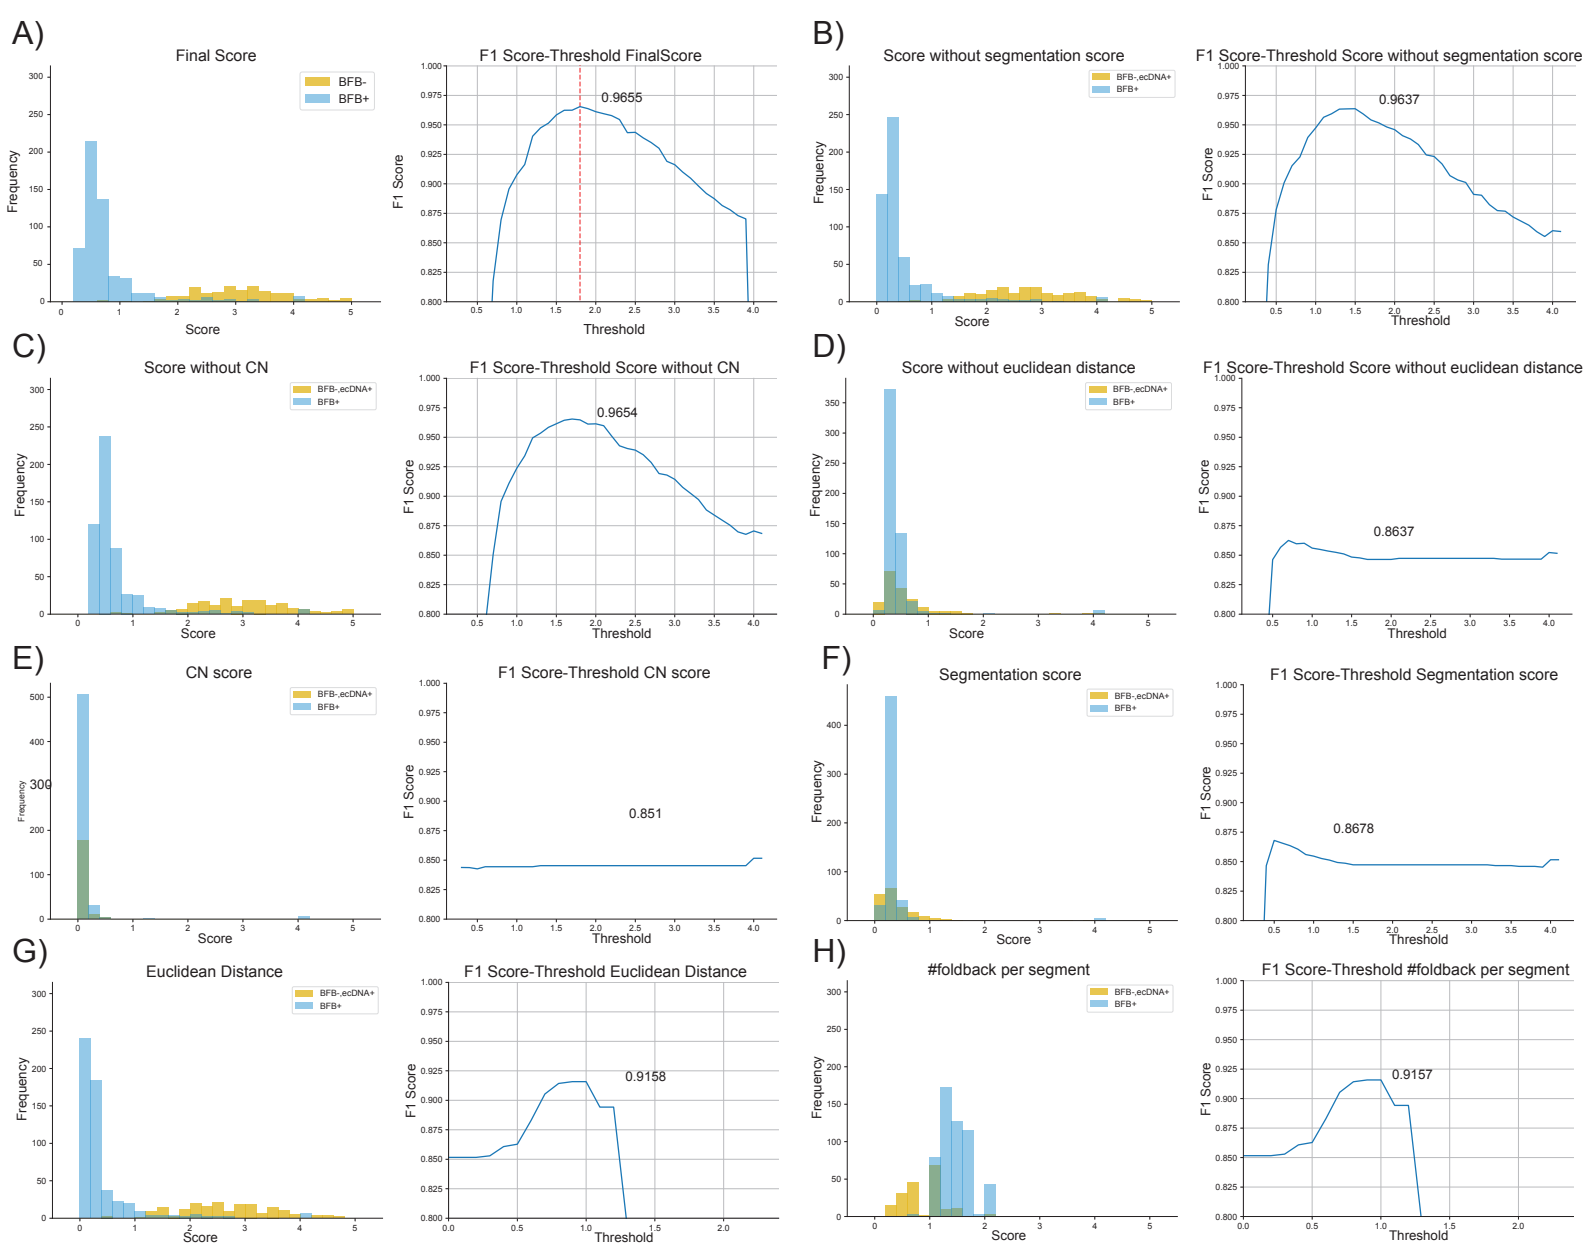

# False Negative

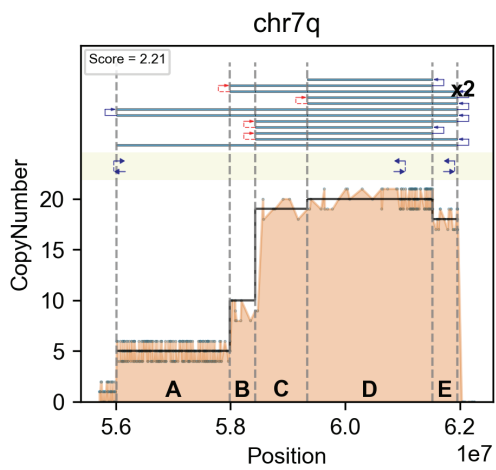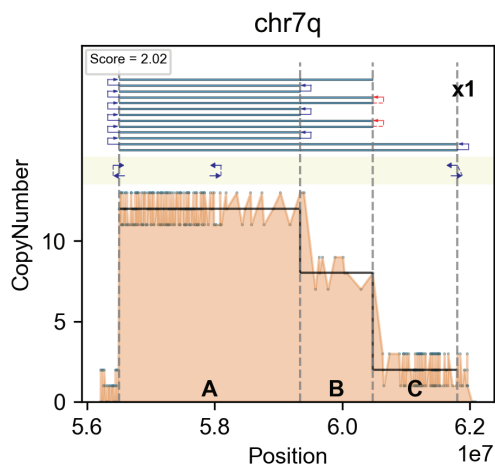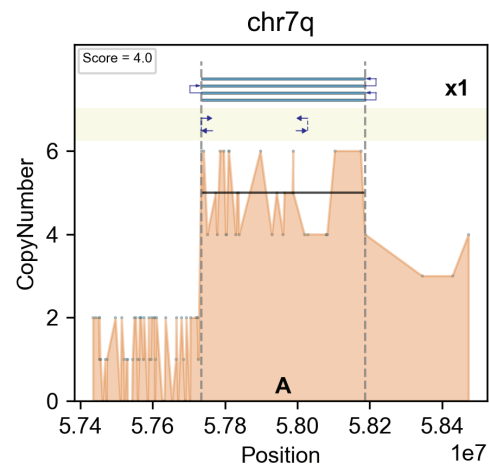

# False Positive

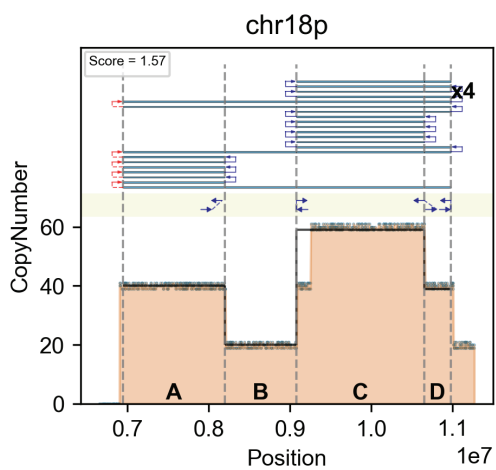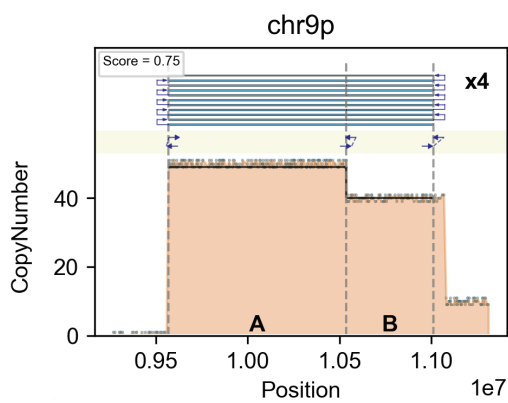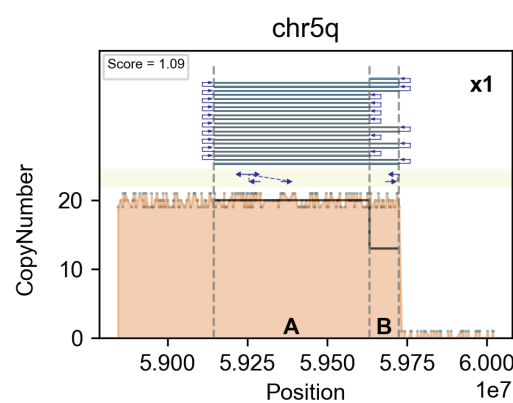

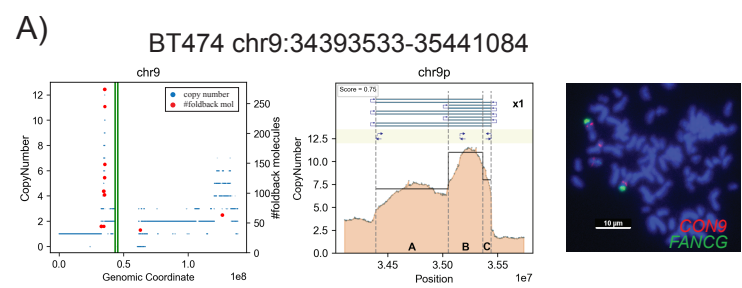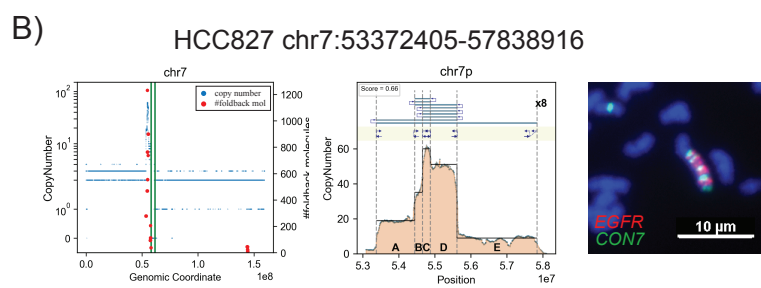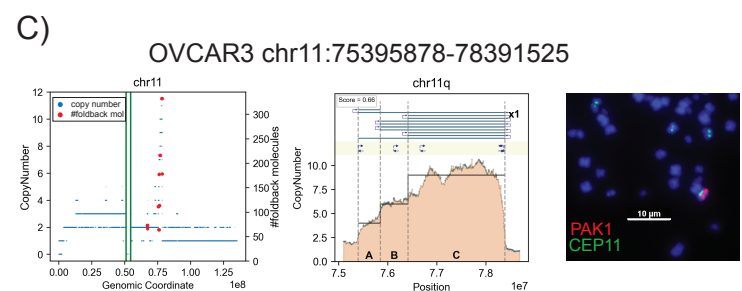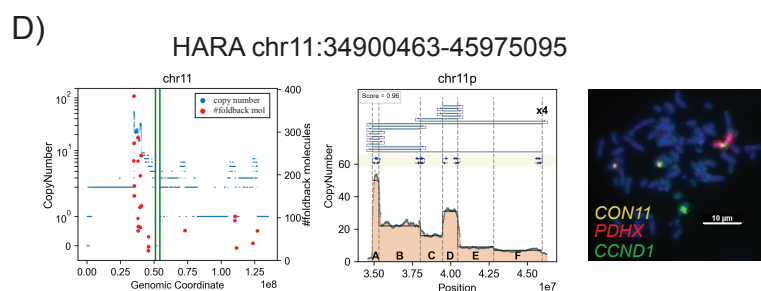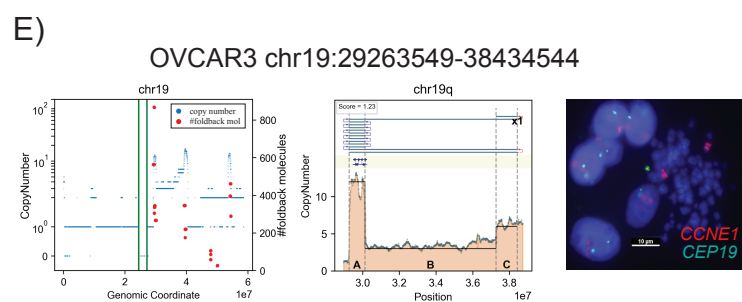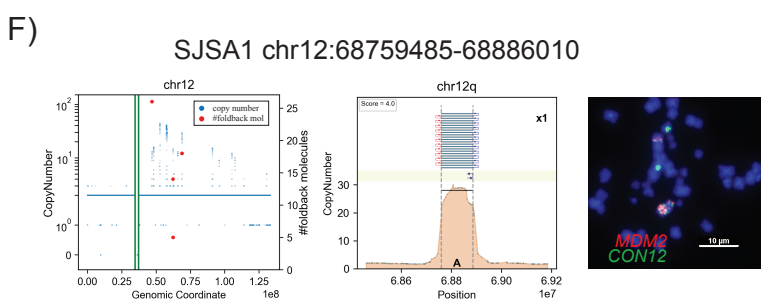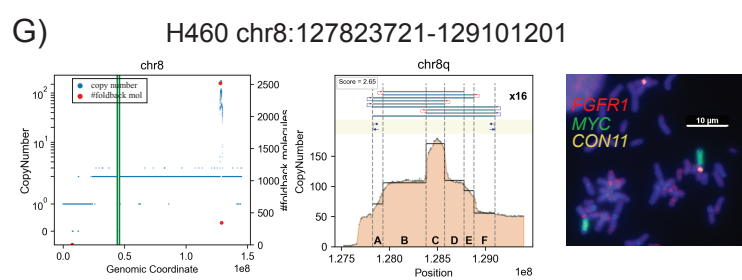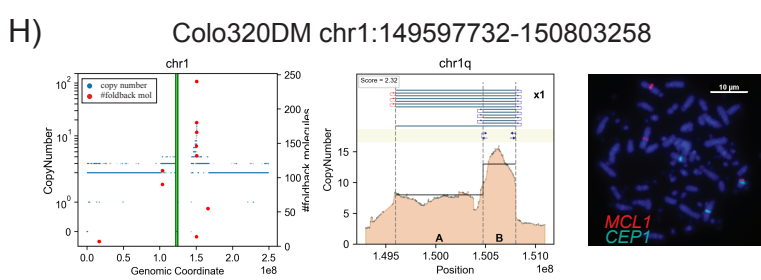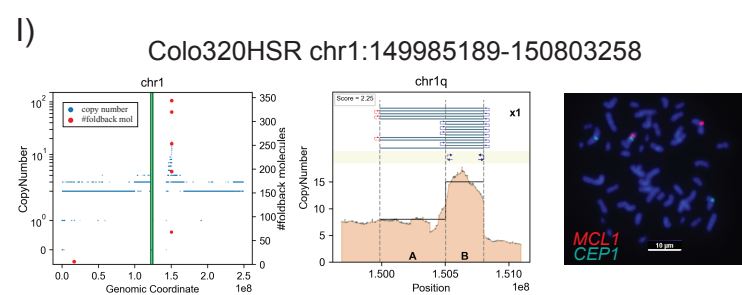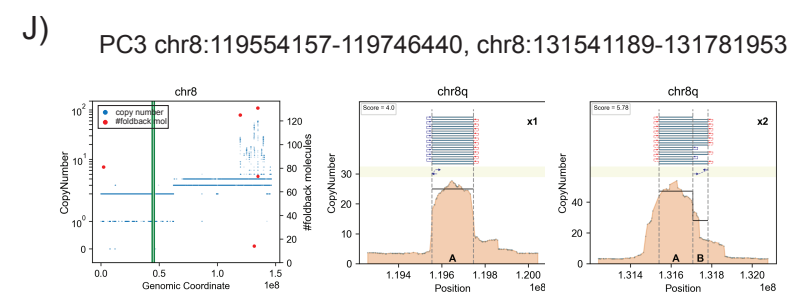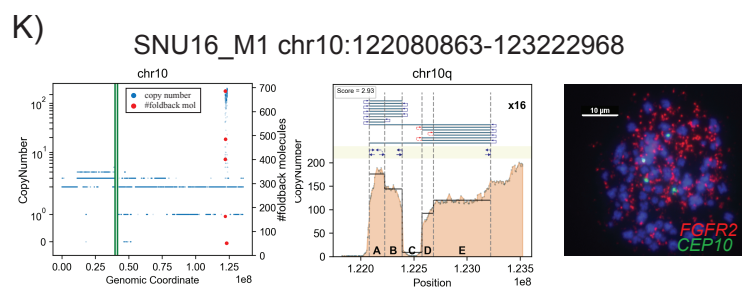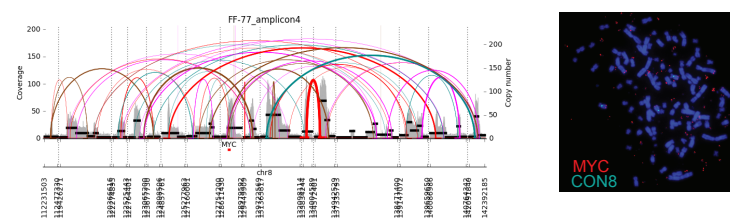

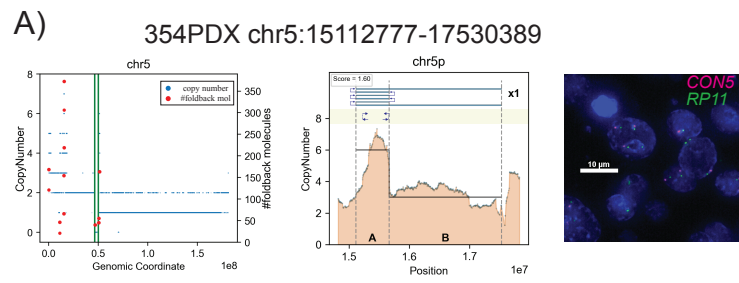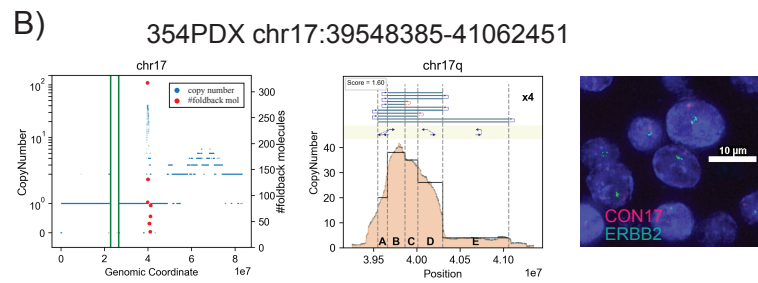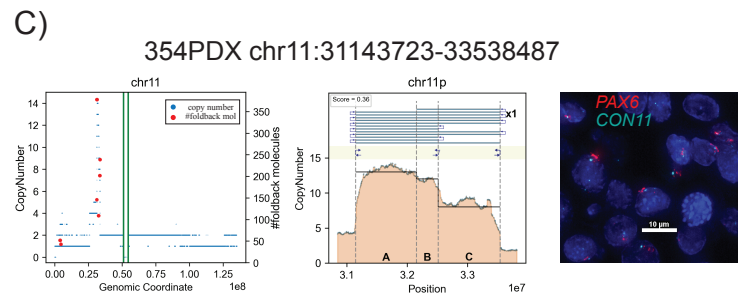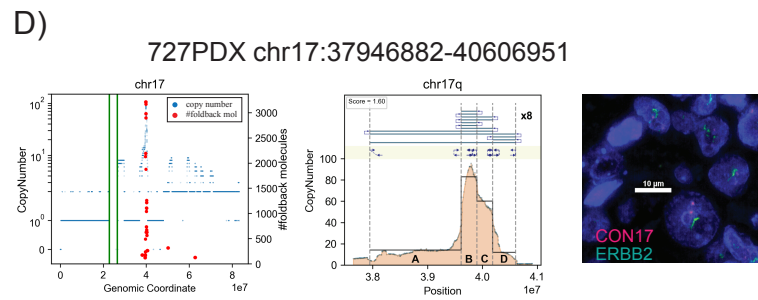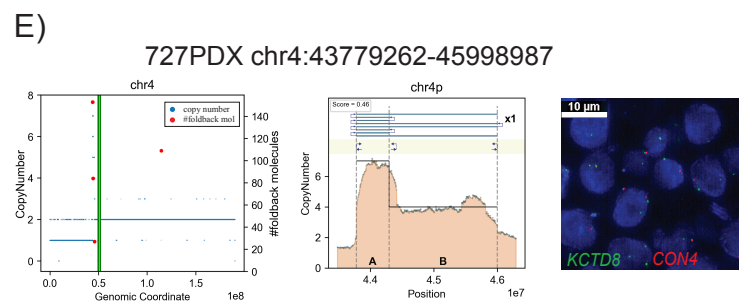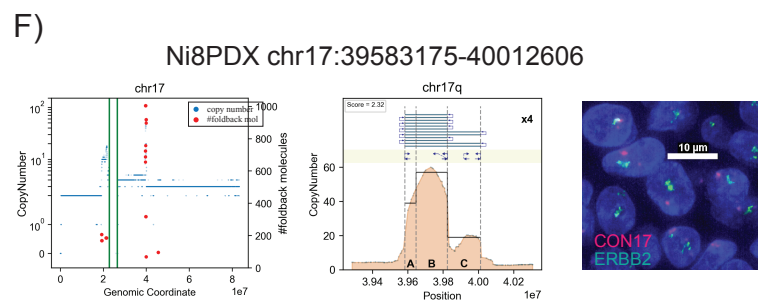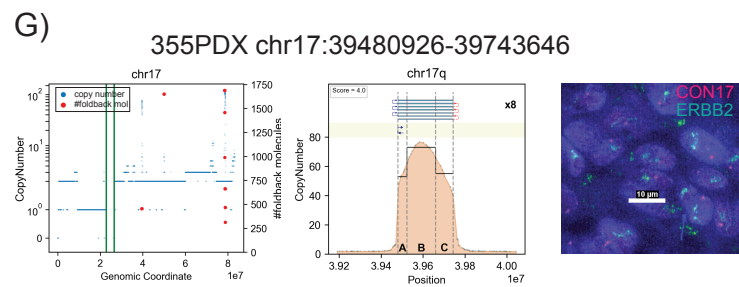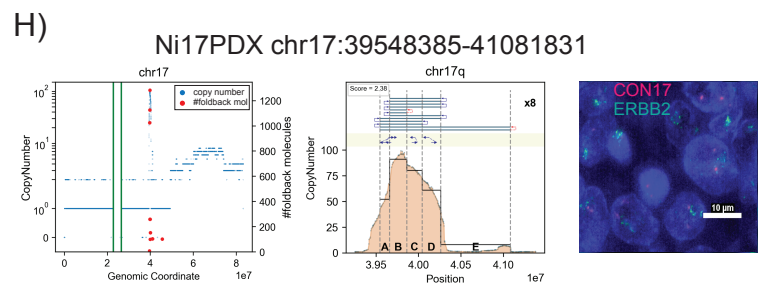

# HN137Met

chr7p

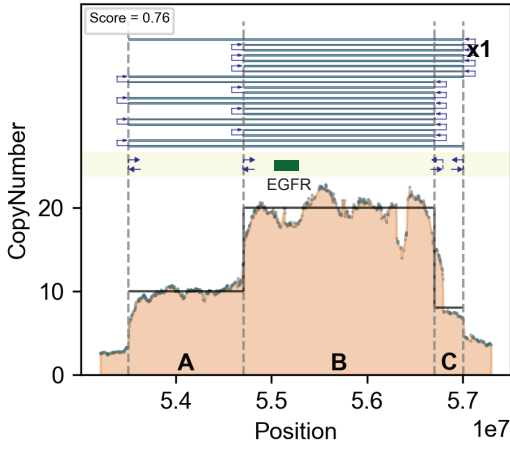

# HN137Pri

chr7p

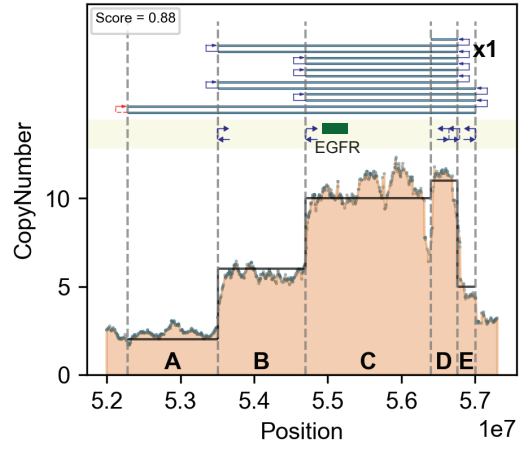

chr11q

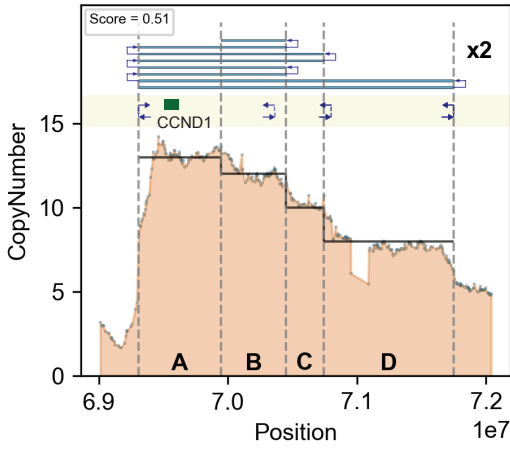

chr11q

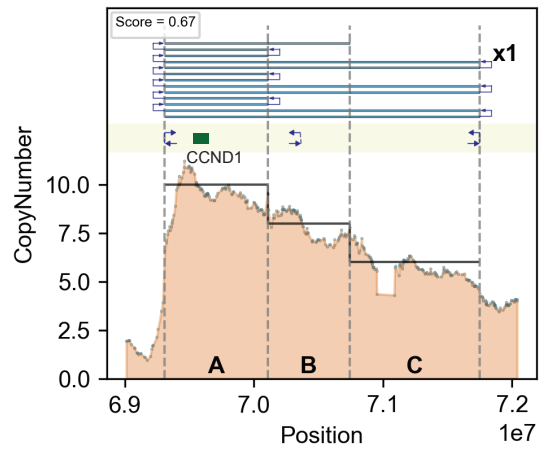

chr18p

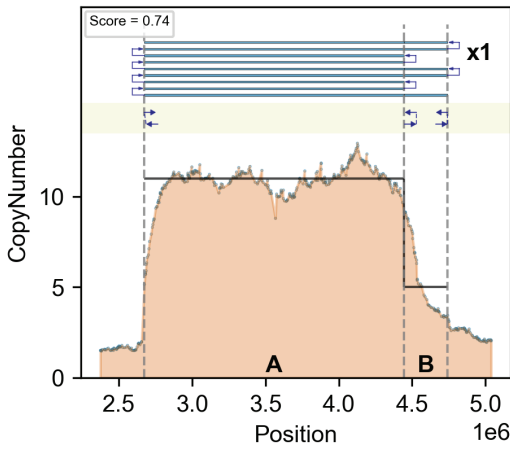

chr18p

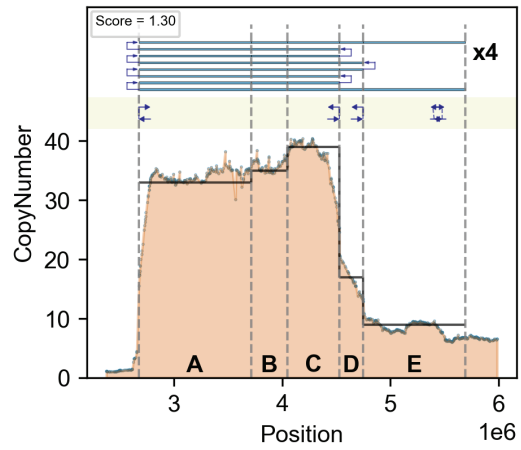

chr11q

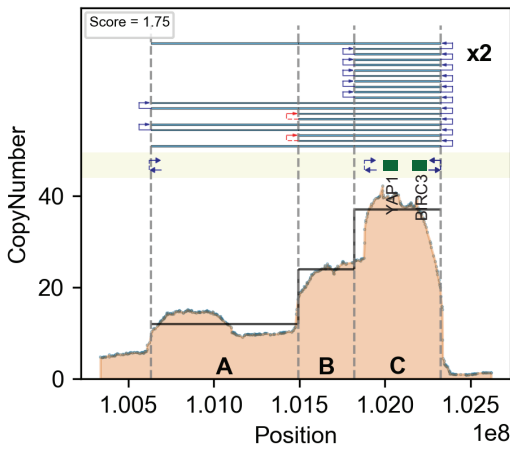

chr3q

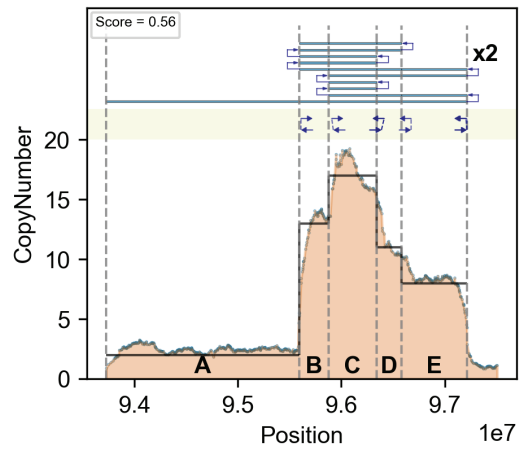

HN137Met  
HSR + ecDNA

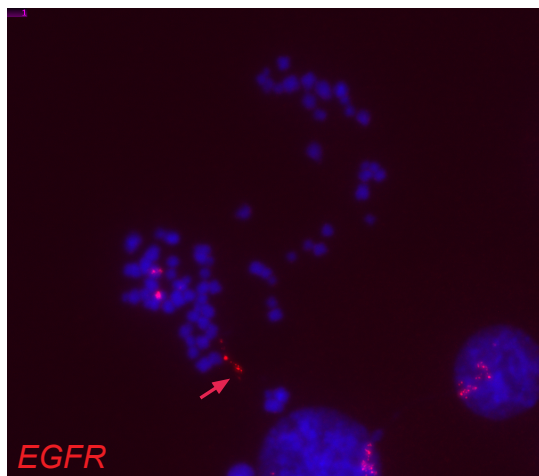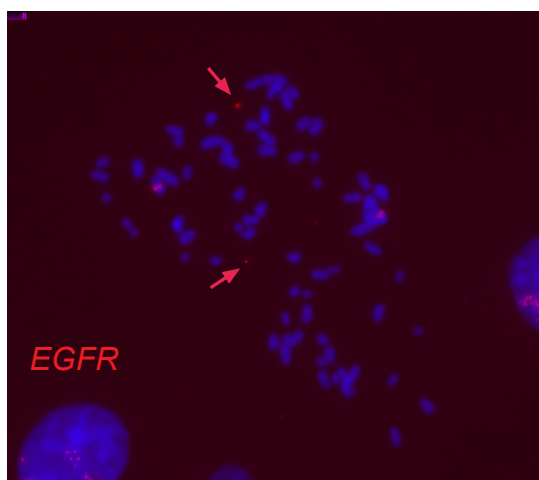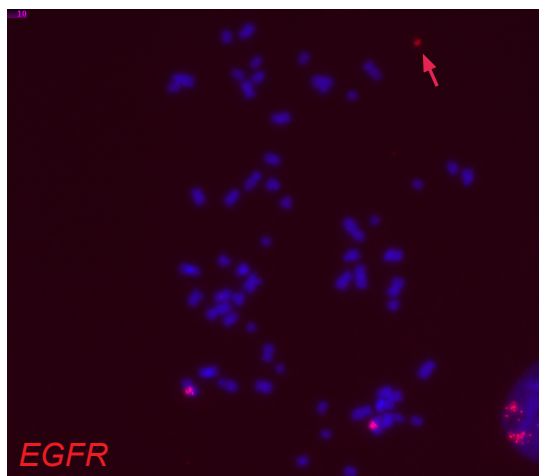

HN137Met  
only HSR

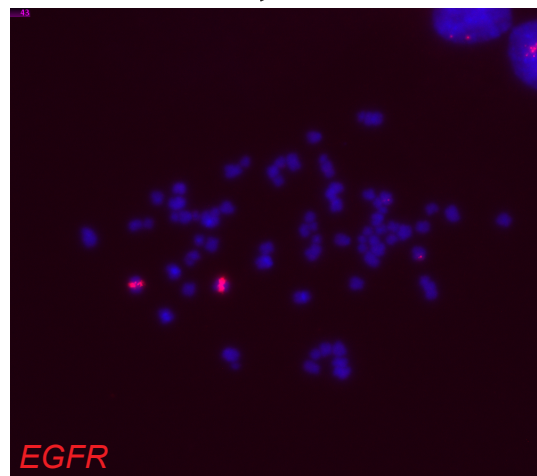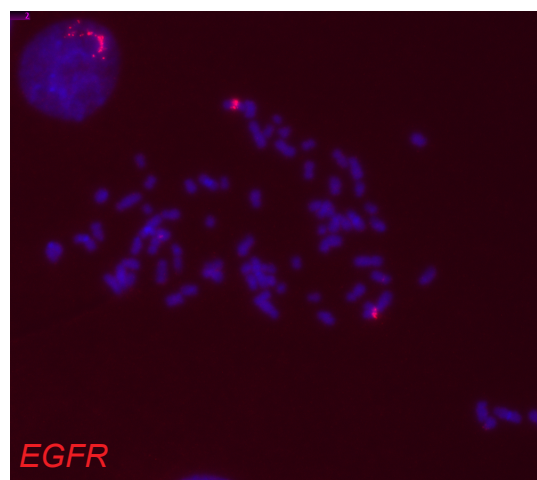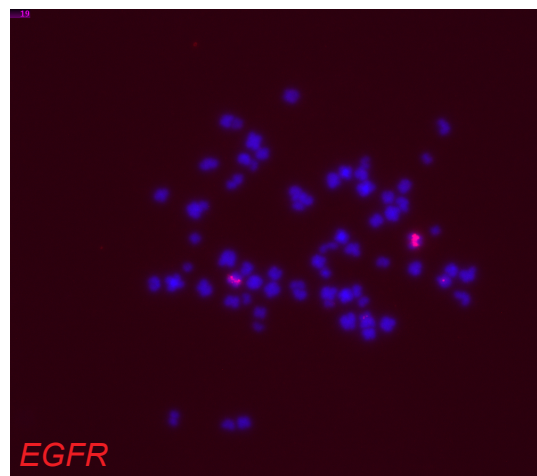





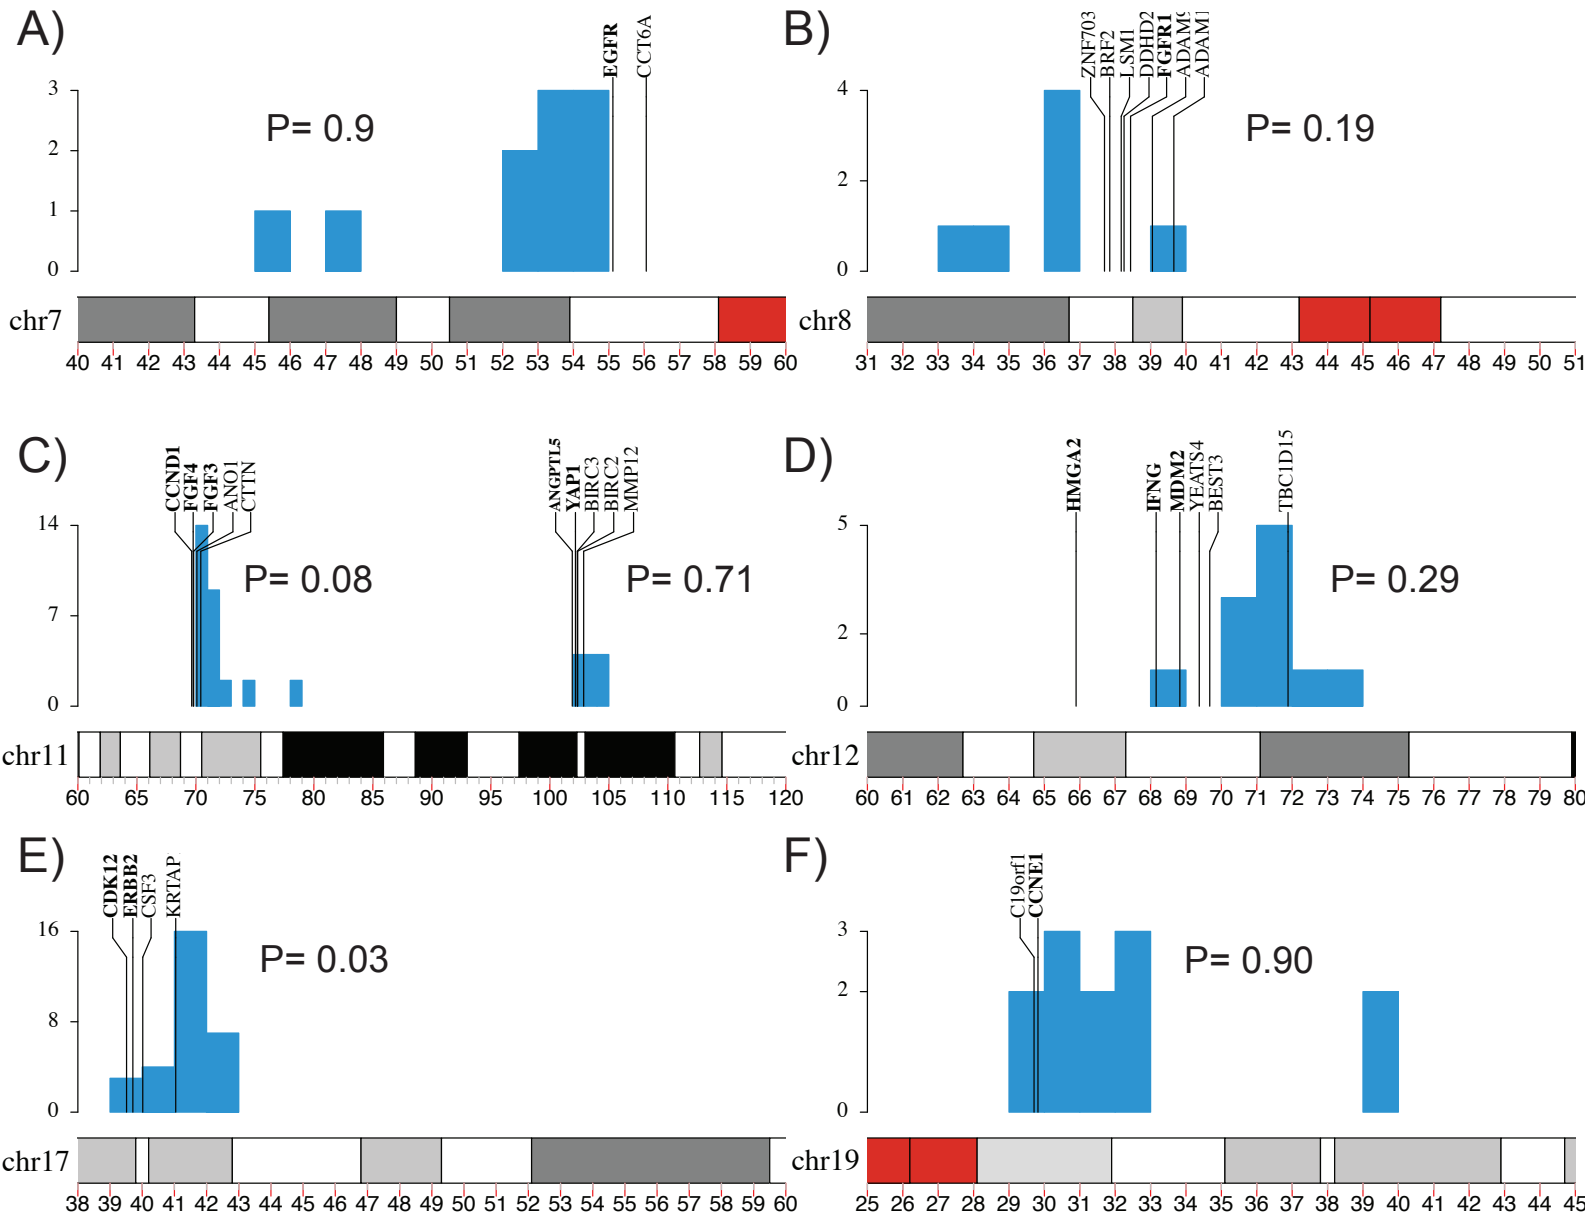

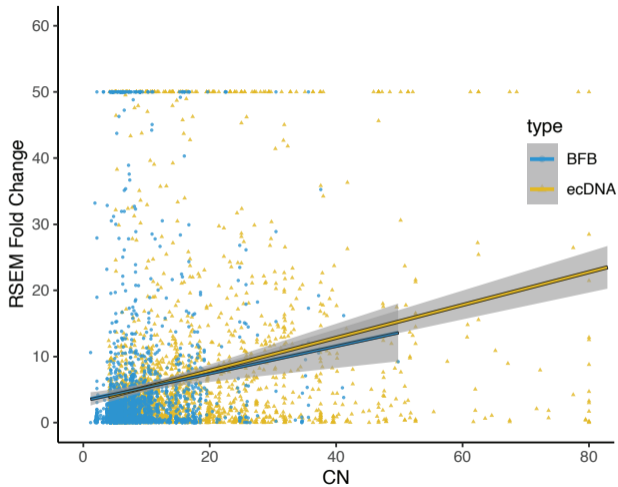

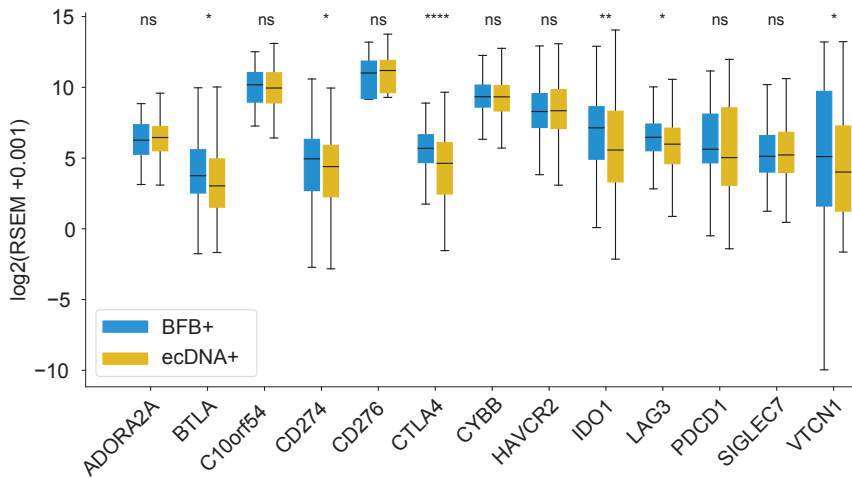

# HCC827 LRDR

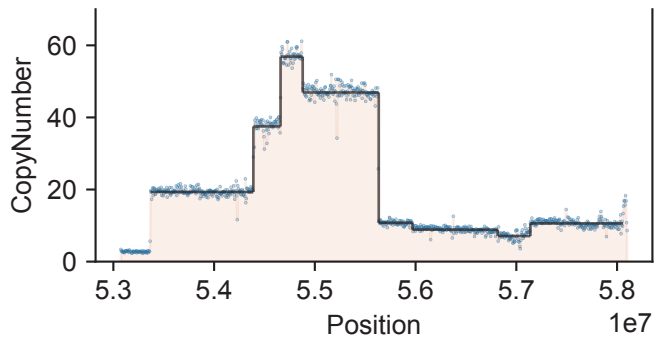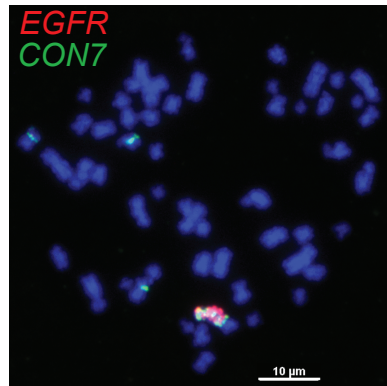

Survival and ecDNA/BFB status in TCGA

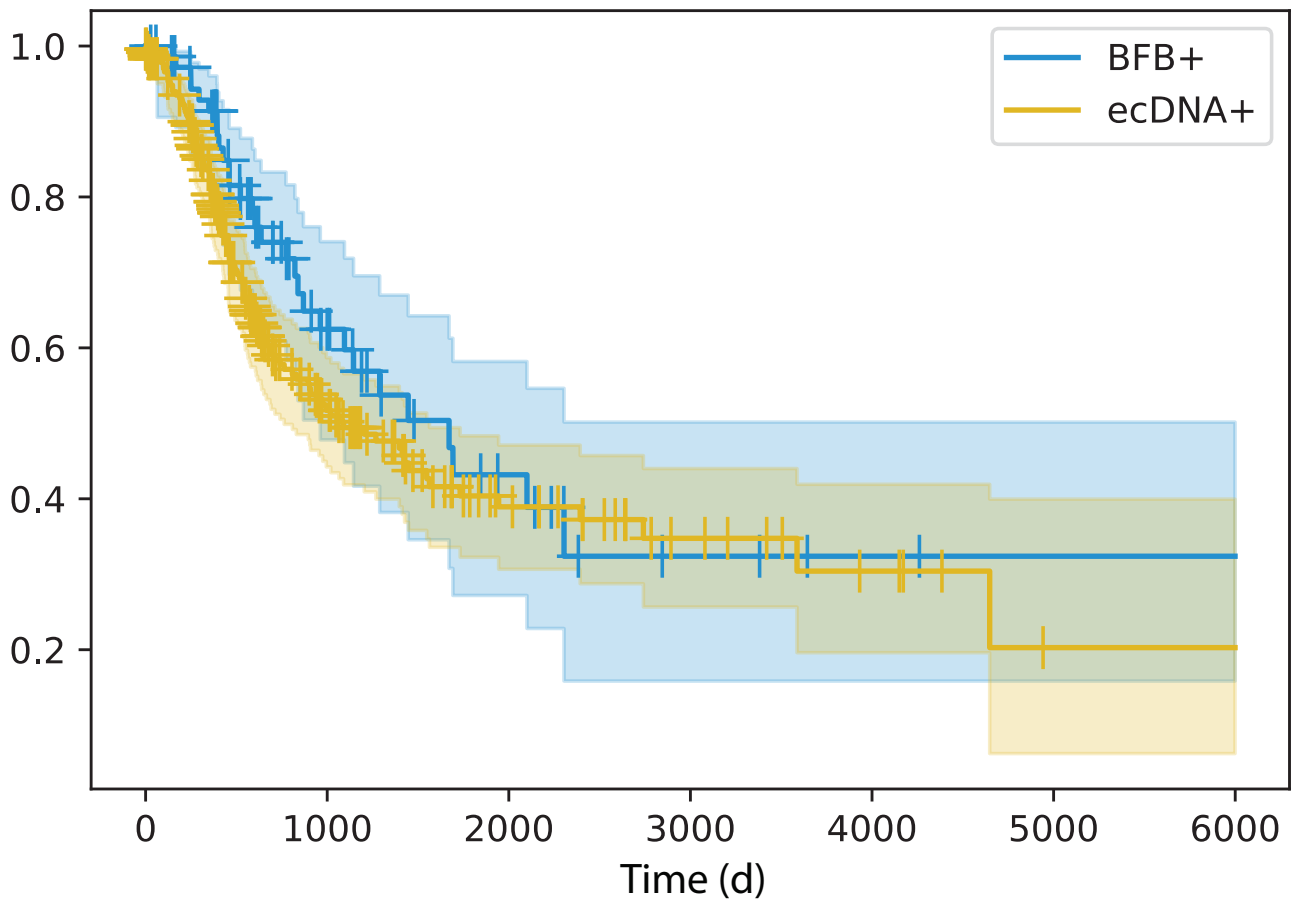

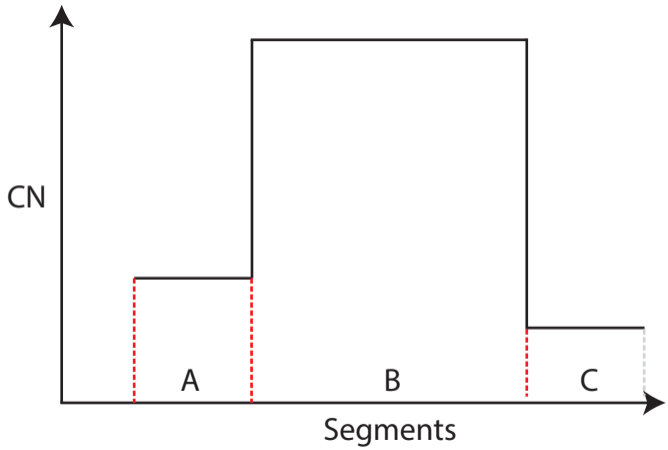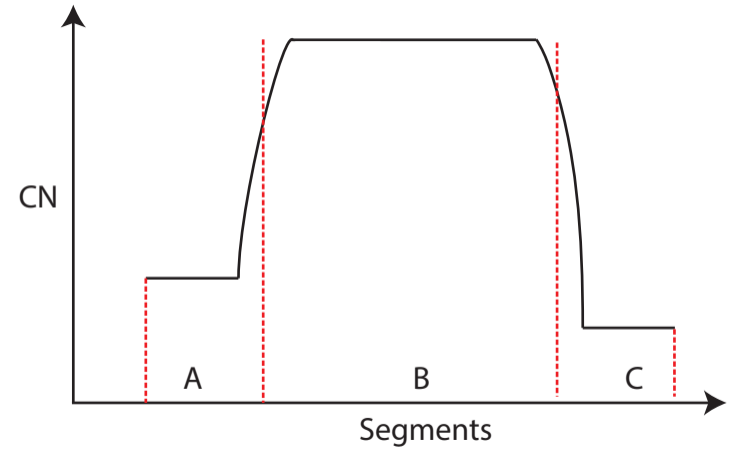

Supplement: media-1.pdf [file media-1.pdf]
